# Supplementary material
Source: publisher figshare collection journal article supplement (https://acs.figshare.com/ndownloader/files/5712273)
Supplement: Supplementary file 1 [file 5712273]

# ic980997v.cif

data_global

_audit_creation method   'SHELXL -with some manual editing'

# SUBMISSION DETAILS

_publ_contact_author
;    Dr. J. Zubieta
     1-014 Centre for Science and Technology
     Syracuse University
     Syracuse, NY        13244-4100
;

_publ_contact_author_email         jazubiet@syr.edu
_publ_contact_author_phone         (315)443-2547
_publ_contact_author_fax      (315)443-4070


# DATA for Cu3Br4(2,2'-bipy)2

data_(1)

_audit_creation_method            SHELXL 
_chemical_name_systematic 
; 
; 
_chemical_name_common             ? 
_chemical_formula_moiety          ? 
_chemical_formula_structural      ? 
_chemical_formula_analytical      ? 
_chemical_formula_sum             'C20 H16 Br4 Cu3 N4' 
_chemical_formula_weight          822.63 
_chemical_melting_point           ? 
_chemical_compound_source
;
Hydrothermal reaction of copper (I) bromide, copper(II) bromide, and (2,2')-dipyridyl
;
 
loop_ 
 _atom_type_symbol 
 _atom_type_description 
 _atom_type_scat_dispersion_real 
 _atom_type_scat_dispersion_imag 
 _atom_type_scat_source 
 'C'  'C'   0.0033   0.0016 
 'International Tables Vol C Tables 4.2.6.8 and 6.1.1.4' 
 'H'  'H'   0.0000   0.0000 
 'International Tables Vol C Tables 4.2.6.8 and 6.1.1.4' 
 'N'  'N'   0.0061   0.0033 
 'International Tables Vol C Tables 4.2.6.8 and 6.1.1.4' 
 'Cu'  'Cu'   0.3201   1.2651 
 'International Tables Vol C Tables 4.2.6.8 and 6.1.1.4' 
 'Br'  'Br'  -0.2901   2.4595 
 'International Tables Vol C Tables 4.2.6.8 and 6.1.1.4' 
 
_symmetry_cell_setting            triclinic
_symmetry_space_group_name_H-M    P-1
 
loop_ 
 _symmetry_equiv_pos_as_xyz 
 'x, y, z' 
 '-x, -y, -z' 
 
_cell_length_a                    10.604(2) 
_cell_length_b                    11.642(3) 
_cell_length_c                    11.688(3) 
_cell_angle_alpha                 61.965(5) 
_cell_angle_beta                  68.346(5) 
_cell_angle_gamma                 69.523(5) 
_cell_volume                      1156.1(4) 
_cell_formula_units_Z             2 
_cell_measurement_temperature     120(2) 
_cell_measurement_reflns_used     ? 
_cell_measurement_theta_min       ? 
_cell_measurement_theta_max       ? 
 
_exptl_crystal_description        'irregular prism'
_exptl_crystal_colour             'dark purple'
_exptl_crystal_size_max           0.18
_exptl_crystal_size_mid           0.10
_exptl_crystal_size_min           0.06
_exptl_crystal_density_meas       'not measured'
_exptl_crystal_density_diffrn     2.363 
_exptl_crystal_density_method     ? 
_exptl_crystal_F_000              782 
_exptl_absorpt_coefficient_mu     9.664 
_exptl_absorpt_correction_type    SADABS 
_exptl_absorpt_correction_T_min   0.619520 
_exptl_absorpt_correction_T_max   1.000000   
 
_exptl_special_details 
; 
 ? 
; 
 
_diffrn_ambient_temperature       120(2) 
_diffrn_radiation_wavelength      0.71073 
_diffrn_radiation_type            MoK\a 
_diffrn_radiation_source          'fine-focus sealed tube' 
_diffrn_radiation_monochromator   graphite 
_diffrn_measurement_device        'Siemens SMART System'
_diffrn_measurement_method        'q-2\q'
_diffrn_standards_number          ? 
_diffrn_standards_interval_count  ? 
_diffrn_standards_interval_time   ? 
_diffrn_standards_decay_%         ? 
_diffrn_reflns_number             7431 
_diffrn_reflns_av_R_equivalents   0.0278 
_diffrn_reflns_av_sigmaI/netI     0.0616 
_diffrn_reflns_limit_h_min        -14 
_diffrn_reflns_limit_h_max        13 
_diffrn_reflns_limit_k_min        -14 
_diffrn_reflns_limit_k_max        14 
_diffrn_reflns_limit_l_min        -8 
_diffrn_reflns_limit_l_max        15 
_diffrn_reflns_theta_min          2.03 
_diffrn_reflns_theta_max          28.28 
_reflns_number_total              5094 
_reflns_number_observed           4088 
_reflns_observed_criterion        >2sigma(I) 
 
_computing_data_collection        'SMART (Siemens, 1995)'
_computing_cell_refinement        ? 
_computing_data_reduction         ? 
_computing_structure_solution     'SHELXS-86 (Sheldrick, 1990)' 
_computing_structure_refinement   'SHELXL-96 (Sheldrick, 1996)' 
_computing_molecular_graphics     ? 
_computing_publication_material   ? 
 
_refine_special_details 
; 
 Refinement on F^2^ for ALL reflections except for 0 with very negative F^2^ 
 or flagged by the user for potential systematic errors.  Weighted R-factors 
 wR and all goodnesses of fit S are based on F^2^, conventional R-factors R 
 are based on F, with F set to zero for negative F^2^. The observed criterion 
 of F^2^ > 2sigma(F^2^) is used only for calculating _R_factor_obs etc. and is 
 not relevant to the choice of reflections for refinement.  R-factors based 
 on F^2^ are statistically about twice as large as those based on F, and R- 
 factors based on ALL data will be even larger. 
; 
 
_refine_ls_structure_factor_coef  Fsqd  
_refine_ls_matrix_type            full 
_refine_ls_weighting_scheme 
 'calc w=1/[\s^2^(Fo^2^)+(0.0396P)^2^+0.0000P] where P=(Fo^2^+2Fc^2^)/3' 
_atom_sites_solution_primary      direct 
_atom_sites_solution_secondary    difmap 
_atom_sites_solution_hydrogens    geom 
_refine_ls_hydrogen_treatment     'Not refined'
_refine_ls_extinction_method      SHELXL 
_refine_ls_extinction_coef        0.0061(4) 
_refine_ls_extinction_expression 
 'Fc^*^=kFc[1+0.001xFc^2^\l^3^/sin(2\q)]^-1/4^' 
_refine_ls_number_reflns          5094 
_refine_ls_number_parameters      281 
_refine_ls_number_restraints      0 
_refine_ls_R_factor_all           0.0582 
_refine_ls_R_factor_obs           0.0408 
_refine_ls_wR_factor_all          0.0947 
_refine_ls_wR_factor_obs          0.0877 
_refine_ls_goodness_of_fit_all    1.051 
_refine_ls_goodness_of_fit_obs    1.092 
_refine_ls_restrained_S_all       1.051 
_refine_ls_restrained_S_obs       1.092 
_refine_ls_shift/esd_max          -0.001 
_refine_ls_shift/esd_mean         0.000 
 
loop_ 
 _atom_site_label 
 _atom_site_type_symbol 
 _atom_site_fract_x 
 _atom_site_fract_y 
 _atom_site_fract_z 
 _atom_site_U_iso_or_equiv 
 _atom_site_thermal_displace_type 
 _atom_site_occupancy 
 _atom_site_calc_flag 
 _atom_site_refinement_flags 
 _atom_site_disorder_group 
Br1 Br -0.09707(5) 1.05894(5) 0.31448(5) 0.02151(14) Uani 1 d . . 
Br2 Br 0.03669(5) 0.80920(5) 0.09581(5) 0.02003(13) Uani 1 d . . 
Br3 Br 0.28521(5) 0.97978(5) 0.10122(6) 0.02105(14) Uani 1 d . . 
Br4 Br 0.35120(6) 0.54164(5) 0.26071(6) 0.02542(15) Uani 1 d . . 
Cu1 Cu -0.29493(6) 1.25878(6) 0.33664(6) 0.01612(15) Uani 1 d . . 
Cu2 Cu 0.03747(7) 1.02502(7) 0.10912(7) 0.0248(2) Uani 1 d . . 
Cu3 Cu 0.26068(8) 0.76484(7) 0.16395(7) 0.0260(2) Uani 1 d . . 
C1 C -0.3034(5) 1.4693(5) 0.0512(5) 0.0201(11) Uani 1 d . . 
H1 H -0.3592(5) 1.4235(5) 0.0503(5) 0.024 Uiso 1 calc R . 
C2 C -0.2754(6) 1.5836(5) -0.0582(6) 0.0224(11) Uani 1 d . . 
H2 H -0.3107(6) 1.6143(5) -0.1319(6) 0.027 Uiso 1 calc R . 
C3 C -0.1922(6) 1.6528(5) -0.0556(5) 0.0212(11) Uani 1 d . . 
H3 H -0.1731(6) 1.7317(5) -0.1269(5) 0.025 Uiso 1 calc R . 
C4 C -0.1389(5) 1.6022(5) 0.0543(5) 0.0204(11) Uani 1 d . . 
H4 H -0.0819(5) 1.6456(5) 0.0569(5) 0.025 Uiso 1 calc R . 
C5 C -0.1713(5) 1.4858(5) 0.1607(5) 0.0166(10) Uani 1 d . . 
C6 C -0.1192(5) 1.4241(5) 0.2827(5) 0.0138(10) Uani 1 d . . 
C7 C -0.0209(5) 1.4682(5) 0.2959(6) 0.0205(11) Uani 1 d . . 
H7 H 0.0144(5) 1.5412(5) 0.2274(6) 0.025 Uiso 1 calc R . 
C8 C 0.0229(5) 1.4010(5) 0.4133(6) 0.0212(11) Uani 1 d . . 
H8 H 0.0859(5) 1.4305(5) 0.4257(6) 0.025 Uiso 1 calc R . 
C9 C -0.0269(5) 1.2903(5) 0.5118(5) 0.0194(11) Uani 1 d . . 
H9 H 0.0022(5) 1.2442(5) 0.5908(5) 0.023 Uiso 1 calc R . 
C10 C -0.1214(5) 1.2490(5) 0.4908(5) 0.0186(11) Uani 1 d . . 
H10 H -0.1538(5) 1.1731(5) 0.5560(5) 0.022 Uiso 1 calc R . 
C11 C -0.4600(5) 1.2961(5) 0.5970(5) 0.0206(11) Uani 1 d . . 
H11 H -0.3883(5) 1.3316(5) 0.5864(5) 0.025 Uiso 1 calc R . 
C12 C -0.5699(6) 1.2850(6) 0.7092(6) 0.0255(12) Uani 1 d . . 
H12 H -0.5717(6) 1.3114(6) 0.7736(6) 0.031 Uiso 1 calc R . 
C13 C -0.6781(5) 1.2336(6) 0.7238(6) 0.0235(12) Uani 1 d . . 
H13 H -0.7525(5) 1.2234(6) 0.7990(6) 0.028 Uiso 1 calc R . 
C14 C -0.6724(5) 1.1983(5) 0.6244(5) 0.0185(11) Uani 1 d . . 
H14 H -0.7441(5) 1.1652(5) 0.6313(5) 0.022 Uiso 1 calc R . 
C15 C -0.5596(5) 1.2122(5) 0.5146(5) 0.0153(10) Uani 1 d . . 
C16 C -0.5437(5) 1.1765(5) 0.4032(5) 0.0139(10) Uani 1 d . . 
C17 C -0.6422(5) 1.1246(5) 0.3990(5) 0.0185(11) Uani 1 d . . 
H17 H -0.7235(5) 1.1126(5) 0.4667(5) 0.022 Uiso 1 calc R . 
C18 C -0.6155(6) 1.0917(5) 0.2923(6) 0.0221(12) Uani 1 d . . 
H18 H -0.6791(6) 1.0573(5) 0.2868(6) 0.026 Uiso 1 calc R . 
C19 C -0.4936(6) 1.1102(5) 0.1932(6) 0.0211(11) Uani 1 d . . 
H19 H -0.4747(6) 1.0889(5) 0.1203(6) 0.025 Uiso 1 calc R . 
C20 C -0.4009(5) 1.1602(5) 0.2038(5) 0.0182(10) Uani 1 d . . 
H20 H -0.3184(5) 1.1713(5) 0.1377(5) 0.022 Uiso 1 calc R . 
N1 N -0.2536(4) 1.4207(4) 0.1595(4) 0.0169(9) Uani 1 d . . 
N2 N -0.1673(4) 1.3156(4) 0.3786(4) 0.0142(8) Uani 1 d . . 
N3 N -0.4530(4) 1.2575(4) 0.5033(4) 0.0147(8) Uani 1 d . . 
N4 N -0.4257(4) 1.1938(4) 0.3072(4) 0.0163(9) Uani 1 d . . 
 
loop_ 
 _atom_site_aniso_label 
 _atom_site_aniso_U_11 
 _atom_site_aniso_U_22 
 _atom_site_aniso_U_33 
 _atom_site_aniso_U_23 
 _atom_site_aniso_U_13 
 _atom_site_aniso_U_12 
Br1 0.0199(3) 0.0205(3) 0.0216(3) -0.0106(2) -0.0029(2) -0.0005(2) 
Br2 0.0240(3) 0.0155(3) 0.0241(3) -0.0038(2) -0.0116(2) -0.0078(2) 
Br3 0.0182(3) 0.0245(3) 0.0273(3) -0.0150(2) -0.0061(2) -0.0048(2) 
Br4 0.0268(3) 0.0208(3) 0.0338(3) -0.0117(2) -0.0134(2) -0.0032(2) 
Cu1 0.0159(3) 0.0204(3) 0.0142(3) -0.0071(3) -0.0015(2) -0.0081(2) 
Cu2 0.0239(4) 0.0263(4) 0.0229(4) -0.0093(3) -0.0058(3) -0.0045(3) 
Cu3 0.0321(4) 0.0226(4) 0.0205(4) -0.0097(3) -0.0032(3) -0.0043(3) 
C1 0.023(3) 0.022(3) 0.018(3) -0.008(2) -0.006(2) -0.007(2) 
C2 0.028(3) 0.021(3) 0.017(3) -0.008(2) -0.006(2) -0.002(2) 
C3 0.028(3) 0.015(3) 0.017(3) -0.007(2) -0.002(2) -0.003(2) 
C4 0.025(3) 0.017(3) 0.020(3) -0.007(2) -0.003(2) -0.007(2) 
C5 0.019(3) 0.017(3) 0.016(3) -0.010(2) -0.003(2) -0.003(2) 
C6 0.017(2) 0.015(2) 0.014(2) -0.012(2) -0.002(2) -0.001(2) 
C7 0.024(3) 0.017(3) 0.022(3) -0.008(2) -0.003(2) -0.008(2) 
C8 0.020(3) 0.023(3) 0.029(3) -0.014(2) -0.006(2) -0.007(2) 
C9 0.017(3) 0.027(3) 0.019(3) -0.013(2) -0.007(2) -0.002(2) 
C10 0.015(2) 0.021(3) 0.018(3) -0.008(2) 0.001(2) -0.007(2) 
C11 0.021(3) 0.023(3) 0.022(3) -0.011(2) -0.004(2) -0.008(2) 
C12 0.021(3) 0.044(4) 0.021(3) -0.022(3) -0.001(2) -0.008(2) 
C13 0.015(3) 0.035(3) 0.016(3) -0.013(2) 0.003(2) -0.005(2) 
C14 0.017(2) 0.019(3) 0.017(3) -0.004(2) -0.005(2) -0.006(2) 
C15 0.016(2) 0.016(2) 0.014(2) -0.005(2) -0.007(2) -0.001(2) 
C16 0.013(2) 0.012(2) 0.016(2) -0.006(2) -0.005(2) -0.002(2) 
C17 0.019(3) 0.020(3) 0.017(3) -0.004(2) -0.006(2) -0.007(2) 
C18 0.028(3) 0.016(3) 0.026(3) -0.007(2) -0.013(2) -0.005(2) 
C19 0.028(3) 0.017(3) 0.021(3) -0.010(2) -0.011(2) 0.001(2) 
C20 0.019(3) 0.023(3) 0.012(2) -0.009(2) 0.000(2) -0.004(2) 
N1 0.020(2) 0.017(2) 0.014(2) -0.005(2) -0.006(2) -0.003(2) 
N2 0.013(2) 0.017(2) 0.012(2) -0.007(2) 0.000(2) -0.004(2) 
N3 0.013(2) 0.017(2) 0.014(2) -0.007(2) 0.000(2) -0.005(2) 
N4 0.015(2) 0.019(2) 0.016(2) -0.007(2) -0.003(2) -0.004(2) 
 
_geom_special_details 
; 
 All esds (except the esd in the dihedral angle between two l.s. planes) 
 are estimated using the full covariance matrix.  The cell esds are taken 
 into account individually in the estimation of esds in distances, angles 
 and torsion angles; correlations between esds in cell parameters are only 
 used when they are defined by crystal symmetry.  An approximate (isotropic) 
 treatment of cell esds is used for estimating esds involving l.s. planes. 
; 
 
loop_ 
 _geom_bond_atom_site_label_1 
 _geom_bond_atom_site_label_2 
 _geom_bond_distance 
 _geom_bond_site_symmetry_2 
 _geom_bond_publ_flag 
Br1 Cu2 2.4336(10) . Y
Br1 Cu1 2.5753(9) . y 
Br2 Cu2 2.4624(10) 2_575 y 
Br2 Cu3 2.5873(10) . y 
Br2 Cu2 2.5924(10) . y 
Br3 Cu3 2.3359(10) . y 
Br3 Cu2 2.4669(10) . y 
Br4 Cu3 2.2904(10) . y 
Cu1 N2 1.984(4) . y 
Cu1 N4 1.986(4) . y 
Cu1 N3 2.045(4) . y 
Cu1 N1 2.067(4) . y 
Cu2 Br2 2.4624(10) 2_575 ? 
C1 N1 1.346(6) . y 
C1 C2 1.375(7) . y 
C2 C3 1.404(7) . y 
C3 C4 1.380(7) . y 
C4 C5 1.388(7) . y 
C5 N1 1.348(6) . y 
C5 C6 1.482(7) . y 
C6 N2 1.345(6) . y 
C6 C7 1.394(7) . y 
C7 C8 1.385(7) . y 
C8 C9 1.377(7) . y 
C9 C10 1.387(7) . y 
C10 N2 1.344(6) . y 
C11 N3 1.336(7) . y 
C11 C12 1.384(7) . y 
C12 C13 1.393(7) . y 
C13 C14 1.379(7) . y 
C14 C15 1.382(7) . y 
C15 N3 1.347(6) . y
C15 C16 1.482(7) . y 
C16 N4 1.339(6) . y
C16 C17 1.401(6) . y  
C17 C18 1.377(7) . y 
C18 C19 1.384(8) . y 
C19 C20 1.371(7) . y 
C20 N4 1.349(6) . y 
 
loop_ 
 _geom_angle_atom_site_label_1 
 _geom_angle_atom_site_label_2 
 _geom_angle_atom_site_label_3 
 _geom_angle 
 _geom_angle_site_symmetry_1 
 _geom_angle_site_symmetry_3 
 _geom_angle_publ_flag 
Cu2 Br1 Cu1 126.88(3) . . ? 
Cu2 Br2 Cu3 129.51(3) 2_575 . ? 
Cu2 Br2 Cu2 80.58(3) 2_575 . ? 
Cu3 Br2 Cu2 72.88(3) . . ? 
Cu3 Br3 Cu2 79.62(3) . . ? 
N2 Cu1 N4 176.2(2) . . ? 
N2 Cu1 N3 96.3(2) . . ? 
N4 Cu1 N3 80.9(2) . . ? 
N2 Cu1 N1 80.8(2) . . ? 
N4 Cu1 N1 102.9(2) . . ? 
N3 Cu1 N1 127.4(2) . . ? 
N2 Cu1 Br1 87.86(12) . . ? 
N4 Cu1 Br1 91.71(12) . . ? 
N3 Cu1 Br1 125.96(12) . . ? 
N1 Cu1 Br1 106.52(12) . . ? 
Br1 Cu2 Br2 116.14(4) . 2_575 ? 
Br1 Cu2 Br3 107.33(3) . . ? 
Br2 Cu2 Br3 116.69(3) 2_575 . ? 
Br1 Cu2 Br2 117.26(3) . . ? 
Br2 Cu2 Br2 99.42(3) 2_575 . ? 
Br3 Cu2 Br2 98.95(3) . . ? 
Br4 Cu3 Br3 145.39(4) . . ? 
Br4 Cu3 Br2 111.96(3) . . ? 
Br3 Cu3 Br2 102.64(3) . . ? 
N1 C1 C2 123.0(5) . . ? 
C1 C2 C3 118.2(5) . . ? 
C4 C3 C2 119.1(5) . . ? 
C3 C4 C5 119.4(5) . . ? 
N1 C5 C4 121.6(5) . . ? 
N1 C5 C6 115.1(4) . . ? 
C4 C5 C6 123.2(4) . . ? 
N2 C6 C7 121.4(5) . . ? 
N2 C6 C5 115.1(4) . . ? 
C7 C6 C5 123.4(5) . . ? 
C8 C7 C6 118.5(5) . . ? 
C9 C8 C7 120.0(5) . . ? 
C8 C9 C10 118.7(5) . . ? 
N2 C10 C9 121.7(5) . . ? 
N3 C11 C12 122.3(5) . . ? 
C11 C12 C13 118.7(5) . . ? 
C14 C13 C12 118.6(5) . . ? 
C13 C14 C15 119.8(5) . . ? 
N3 C15 C14 121.4(5) . . ? 
N3 C15 C16 114.8(4) . . ? 
C14 C15 C16 123.8(4) . . ? 
N4 C16 C17 121.8(5) . . ? 
N4 C16 C15 115.1(4) . . ? 
C17 C16 C15 123.1(5) . . ? 
C18 C17 C16 118.3(5) . . ? 
C17 C18 C19 119.6(5) . . ? 
C20 C19 C18 119.2(5) . . ? 
N4 C20 C19 122.0(5) . . ? 
C1 N1 C5 118.8(4) . . ? 
C1 N1 Cu1 128.2(3) . . ? 
C5 N1 Cu1 112.9(3) . . ? 
C10 N2 C6 119.6(4) . . ? 
C10 N2 Cu1 124.4(3) . . ? 
C6 N2 Cu1 115.9(3) . . ? 
C11 N3 C15 119.1(4) . . ? 
C11 N3 Cu1 127.4(3) . . ? 
C15 N3 Cu1 113.5(3) . . ? 
C16 N4 C20 119.1(4) . . ? 
C16 N4 Cu1 115.6(3) . . ? 
C20 N4 Cu1 125.2(3) . . ? 
 
_refine_diff_density_max    0.888 
_refine_diff_density_min   -0.774 
_refine_diff_density_rms    0.179 


#DATA for CuBr2(2,2'-bipy)

data_(2)

_chemical_name_systematic 
; 
 ? 
; 
_chemical_name_common             ? 
_chemical_formula_moiety          ? 
_chemical_formula_structural      ? 
_chemical_formula_analytical      ? 
_chemical_formula_sum             'C5 H4 Br Cu0.50 N' 
_chemical_formula_weight          189.77 
_chemical_melting_point           ? 
_chemical_compound_source         
;
Hydrothermal reaction of copper (I) bromide, copper(II) bromide, and (2,2')-dipyridyl
;

loop_ 
 _atom_type_symbol 
 _atom_type_description 
 _atom_type_scat_dispersion_real 
 _atom_type_scat_dispersion_imag 
 _atom_type_scat_source 
 'C'  'C'   0.0033   0.0016 
 'International Tables Vol C Tables 4.2.6.8 and 6.1.1.4' 
 'H'  'H'   0.0000   0.0000 
 'International Tables Vol C Tables 4.2.6.8 and 6.1.1.4' 
 'N'  'N'   0.0061   0.0033 
 'International Tables Vol C Tables 4.2.6.8 and 6.1.1.4' 
 'Cu'  'Cu'   0.3201   1.2651 
 'International Tables Vol C Tables 4.2.6.8 and 6.1.1.4' 
 'Br'  'Br'  -0.2901   2.4595 
 'International Tables Vol C Tables 4.2.6.8 and 6.1.1.4' 
 
_symmetry_cell_setting            monoclinic
_symmetry_space_group_name_H-M    C2/c
 
loop_ 
 _symmetry_equiv_pos_as_xyz 
 'x, y, z' 
 '-x, y, -z+1/2' 
 'x+1/2, y+1/2, z' 
 '-x+1/2, y+1/2, -z+1/2' 
 '-x, -y, -z' 
 'x, -y, z-1/2' 
 '-x+1/2, -y+1/2, -z' 
 'x+1/2, -y+1/2, z-1/2' 
 
_cell_length_a                    16.766(4) 
_cell_length_b                    9.287(2) 
_cell_length_c                    7.392(2) 
_cell_angle_alpha                 90.00 
_cell_angle_beta                  110.536(6) 
_cell_angle_gamma                 90.00 
_cell_volume                      1077.9(5) 
_cell_formula_units_Z             8 
_cell_measurement_temperature     120(2) 
_cell_measurement_reflns_used     ? 
_cell_measurement_theta_min       ? 
_cell_measurement_theta_max       ? 
 
_exptl_crystal_description        'triangular prism' 
_exptl_crystal_colour             brown 
_exptl_crystal_size_max           0.28 
_exptl_crystal_size_mid           0.20 
_exptl_crystal_size_min           0.10 
_exptl_crystal_density_meas       'Not measured'
_exptl_crystal_density_diffrn     2.339 
_exptl_crystal_density_method     ? 
_exptl_crystal_F_000              724 
_exptl_absorpt_coefficient_mu     9.403 
_exptl_absorpt_correction_type    SADABS 
_exptl_absorpt_correction_T_min   0.619092 
_exptl_absorpt_correction_T_max   1.000000   
 
_exptl_special_details 
; 
 ? 
; 
 
_diffrn_ambient_temperature       120(2) 
_diffrn_radiation_wavelength      0.71073 
_diffrn_radiation_type            MoK\a 
_diffrn_radiation_source          'fine-focus sealed tube' 
_diffrn_radiation_monochromator   graphite 
_diffrn_measurement_device        'Siemens SMART System' 
_diffrn_measurement_method        'q-2\q'
_diffrn_standards_number          ? 
_diffrn_standards_interval_count  ? 
_diffrn_standards_interval_time   ? 
_diffrn_standards_decay_%         ? 
_diffrn_reflns_number             3403 
_diffrn_reflns_av_R_equivalents   0.0341 
_diffrn_reflns_av_sigmaI/netI     0.0391 
_diffrn_reflns_limit_h_min        -22 
_diffrn_reflns_limit_h_max        22 
_diffrn_reflns_limit_k_min        -12 
_diffrn_reflns_limit_k_max        11 
_diffrn_reflns_limit_l_min        -9 
_diffrn_reflns_limit_l_max        8 
_diffrn_reflns_theta_min          2.55 
_diffrn_reflns_theta_max          28.26 
_reflns_number_total              1278 
_reflns_number_observed           1119 
_reflns_observed_criterion        >2sigma(I) 
 
_computing_data_collection        'SMART (Siemens, 1995)' 
_computing_cell_refinement        ? 
_computing_data_reduction         ? 
_computing_structure_solution     'SHELXS-86 (Sheldrick, 1990)' 
_computing_structure_refinement   'SHELXL-96 (Sheldrick, 1996)' 
_computing_molecular_graphics     ? 
_computing_publication_material   ? 
 
_refine_special_details 
; 
 Refinement on F^2^ for ALL reflections except for 0 with very negative F^2^ 
 or flagged by the user for potential systematic errors.  Weighted R-factors 
 wR and all goodnesses of fit S are based on F^2^, conventional R-factors R 
 are based on F, with F set to zero for negative F^2^. The observed criterion 
 of F^2^ > 2sigma(F^2^) is used only for calculating _R_factor_obs etc. and is 
 not relevant to the choice of reflections for refinement.  R-factors based 
 on F^2^ are statistically about twice as large as those based on F, and R- 
 factors based on ALL data will be even larger. 
; 
 
_refine_ls_structure_factor_coef  Fsqd  
_refine_ls_matrix_type            full 
_refine_ls_weighting_scheme 
 'calc w=1/[\s^2^(Fo^2^)+(0.0598P)^2^+0.0000P] where P=(Fo^2^+2Fc^2^)/3' 
_atom_sites_solution_primary      direct 
_atom_sites_solution_secondary    difmap 
_atom_sites_solution_hydrogens    geom 
_refine_ls_hydrogen_treatment     'Not refined'
_refine_ls_extinction_method      SHELXL 
_refine_ls_extinction_coef        0.0007(3) 
_refine_ls_extinction_expression 
 'Fc^*^=kFc[1+0.001xFc^2^\l^3^/sin(2\q)]^-1/4^' 
_refine_ls_number_reflns          1278 
_refine_ls_number_parameters      70 
_refine_ls_number_restraints      0 
_refine_ls_R_factor_all           0.0423 
_refine_ls_R_factor_obs           0.0351 
_refine_ls_wR_factor_all          0.0890 
_refine_ls_wR_factor_obs          0.0861 
_refine_ls_goodness_of_fit_all    1.035 
_refine_ls_goodness_of_fit_obs    1.074 
_refine_ls_restrained_S_all       1.035 
_refine_ls_restrained_S_obs       1.074 
_refine_ls_shift/esd_max          0.000 
_refine_ls_shift/esd_mean         0.000 
 
loop_ 
 _atom_site_label 
 _atom_site_type_symbol 
 _atom_site_fract_x 
 _atom_site_fract_y 
 _atom_site_fract_z 
 _atom_site_U_iso_or_equiv 
 _atom_site_thermal_displace_type 
 _atom_site_occupancy 
 _atom_site_calc_flag 
 _atom_site_refinement_flags 
 _atom_site_disorder_group 
Br1 Br 0.40751(2) 0.39085(4) 0.04996(5) 0.0179(2) Uani 1 d . . 
Cu1 Cu 0.5000 0.57377(7) 0.2500 0.0153(2) Uani 1 d S . 
C1 C 0.3525(2) 0.7329(4) -0.0407(5) 0.0200(8) Uani 1 d . . 
H1 H 0.3313(2) 0.6428(4) -0.0885(5) 0.024 Uiso 1 calc R . 
C2 C 0.3044(2) 0.8578(5) -0.1253(5) 0.0208(8) Uani 1 d . . 
H2 H 0.2526(2) 0.8497(5) -0.2267(5) 0.025 Uiso 1 calc R . 
C3 C 0.3360(3) 0.9886(5) -0.0545(6) 0.0265(9) Uani 1 d . . 
H3 H 0.3055(3) 1.0719(5) -0.1046(6) 0.032 Uiso 1 calc R . 
C4 C 0.4137(3) 0.9966(5) 0.0925(6) 0.0229(8) Uani 1 d . . 
H4 H 0.4359(3) 1.0863(5) 0.1401(6) 0.028 Uiso 1 calc R . 
C5 C 0.4596(3) 0.8734(4) 0.1711(5) 0.0171(8) Uani 1 d . . 
N1 N 0.4273(2) 0.7412(3) 0.1056(4) 0.0146(6) Uani 1 d . . 
 
loop_ 
 _atom_site_aniso_label 
 _atom_site_aniso_U_11 
 _atom_site_aniso_U_22 
 _atom_site_aniso_U_33 
 _atom_site_aniso_U_23 
 _atom_site_aniso_U_13 
 _atom_site_aniso_U_12 
Br1 0.0181(2) 0.0120(2) 0.0187(2) -0.00229(12) 0.0004(2) -0.00313(11) 
Cu1 0.0140(3) 0.0095(3) 0.0166(3) 0.000 -0.0018(2) 0.000 
C1 0.017(2) 0.020(2) 0.020(2) 0.0044(14) 0.002(2) 0.0033(14) 
C2 0.008(2) 0.036(2) 0.016(2) 0.001(2) 0.0015(14) 0.0047(15) 
C3 0.030(2) 0.021(2) 0.027(2) 0.007(2) 0.008(2) 0.008(2) 
C4 0.028(2) 0.018(2) 0.024(2) 0.003(2) 0.010(2) 0.003(2) 
C5 0.030(2) 0.008(2) 0.021(2) 0.0010(13) 0.019(2) 0.0031(13) 
N1 0.0130(14) 0.013(2) 0.0157(15) -0.0001(11) 0.0029(11) -0.0006(11) 
 
_geom_special_details 
; 
 All esds (except the esd in the dihedral angle between two l.s. planes) 
 are estimated using the full covariance matrix.  The cell esds are taken 
 into account individually in the estimation of esds in distances, angles 
 and torsion angles; correlations between esds in cell parameters are only 
 used when they are defined by crystal symmetry.  An approximate (isotropic) 
 treatment of cell esds is used for estimating esds involving l.s. planes. 
; 
 
loop_ 
 _geom_bond_atom_site_label_1 
 _geom_bond_atom_site_label_2 
 _geom_bond_distance 
 _geom_bond_site_symmetry_2 
 _geom_bond_publ_flag 
Br1 Cu1 2.4224(7) . Y 
Cu1 N1 2.033(3) 2_655 ? 
Cu1 N1 2.033(3) . Y 
Cu1 Br1 2.4224(7) 2_655 ? 
C1 N1 1.340(4) . ? 
C1 C2 1.426(5) . ? 
C2 C3 1.354(6) . ? 
C3 C4 1.374(5) . ? 
C4 C5 1.388(5) . ? 
C5 N1 1.360(5) . ? 
C5 C5 1.444(8) 2_655 ? 
 
loop_ 
 _geom_angle_atom_site_label_1 
 _geom_angle_atom_site_label_2 
 _geom_angle_atom_site_label_3 
 _geom_angle 
 _geom_angle_site_symmetry_1 
 _geom_angle_site_symmetry_3 
 _geom_angle_publ_flag 
N1 Cu1 N1 80.2(2) 2_655 . Y 
N1 Cu1 Br1 174.11(9) 2_655 . Y 
N1 Cu1 Br1 94.50(9) . . Y 
N1 Cu1 Br1 94.50(9) 2_655 2_655 Y 
N1 Cu1 Br1 174.11(9) . 2_655 ? 
Br1 Cu1 Br1 90.94(3) . 2_655 Y 
N1 C1 C2 122.2(4) . . ? 
C3 C2 C1 118.4(4) . . ? 
C2 C3 C4 119.2(4) . . ? 
C3 C4 C5 121.3(4) . . ? 
N1 C5 C4 120.1(4) . . ? 
N1 C5 C5 115.6(2) . 2_655 ? 
C4 C5 C5 124.3(3) . 2_655 ? 
C1 N1 C5 118.9(3) . . ? 
C1 N1 Cu1 126.8(2) . . ? 
C5 N1 Cu1 114.4(3) . . ? 
 
_refine_diff_density_max    1.252 
_refine_diff_density_min   -0.520 
_refine_diff_density_rms    0.216 


#DATA for [Cu2(OH)2(2,2'-bipy)2][Cu4Br6]

data_(3)

_chemical_name_systematic 
; 
 ? 
; 
_chemical_name_common             ? 
_chemical_formula_moiety          ? 
_chemical_formula_structural      ? 
_chemical_formula_analytical      ? 
_chemical_formula_sum             'C10 H9 Br3 Cu3 N2 O' 
_chemical_formula_weight          603.54 
_chemical_melting_point           ? 
_chemical_compound_source       
;
Hydrothermal reaction of copper (I) bromide, copper(II) bromide, and (2,2')-dipyridyl
;
 
loop_ 
 _atom_type_symbol 
 _atom_type_description 
 _atom_type_scat_dispersion_real 
 _atom_type_scat_dispersion_imag 
 _atom_type_scat_source 
 'C'  'C'   0.0033   0.0016 
 'International Tables Vol C Tables 4.2.6.8 and 6.1.1.4' 
 'H'  'H'   0.0000   0.0000 
 'International Tables Vol C Tables 4.2.6.8 and 6.1.1.4' 
 'N'  'N'   0.0061   0.0033 
 'International Tables Vol C Tables 4.2.6.8 and 6.1.1.4' 
 'O'  'O'   0.0106   0.0060 
 'International Tables Vol C Tables 4.2.6.8 and 6.1.1.4' 
 'Cu'  'Cu'   0.3201   1.2651 
 'International Tables Vol C Tables 4.2.6.8 and 6.1.1.4' 
 'Br'  'Br'  -0.2901   2.4595 
 'International Tables Vol C Tables 4.2.6.8 and 6.1.1.4' 
 
_symmetry_cell_setting            Monoclinic 
_symmetry_space_group_name_H-M    P2(1)/n
 
loop_ 
 _symmetry_equiv_pos_as_xyz 
 'x, y, z' 
 '-x+1/2, y+1/2, -z+1/2' 
 '-x, -y, -z' 
 'x-1/2, -y-1/2, z-1/2' 
 
_cell_length_a                    10.907(3) 
_cell_length_b                    6.0677(13) 
_cell_length_c                    21.620(5) 
_cell_angle_alpha                 90.00 
_cell_angle_beta                  90.542(4) 
_cell_angle_gamma                 90.00 
_cell_volume                      1430.8(6) 
_cell_formula_units_Z             4 
_cell_measurement_temperature     120(2) 
_cell_measurement_reflns_used     ? 
_cell_measurement_theta_min       ? 
_cell_measurement_theta_max       ? 
 
_exptl_crystal_description        'rectangular prism' 
_exptl_crystal_colour             black
_exptl_crystal_size_max           0.30
_exptl_crystal_size_mid           0.15
_exptl_crystal_size_min           0.15
_exptl_crystal_density_meas       'Not measured'
_exptl_crystal_density_diffrn     2.802 
_exptl_crystal_density_method     ? 
_exptl_crystal_F_000              1132 
_exptl_absorpt_coefficient_mu     12.785 
_exptl_absorpt_correction_type    SADABS
_exptl_absorpt_correction_T_min   0.589018
_exptl_absorpt_correction_T_max   1.000000   
 
_exptl_special_details 
; 
 ? 
; 
 
_diffrn_ambient_temperature       293(2) 
_diffrn_radiation_wavelength      0.71073 
_diffrn_radiation_type            MoK\a 
_diffrn_radiation_source          'fine-focus sealed tube' 
_diffrn_radiation_monochromator   graphite 
_diffrn_measurement_device        'Siemens SMART System' 
_diffrn_measurement_method        'q-2\q'  
_diffrn_standards_number          ? 
_diffrn_standards_interval_count  ? 
_diffrn_standards_interval_time   ? 
_diffrn_standards_decay_%         ? 
_diffrn_reflns_number             8190 
_diffrn_reflns_av_R_equivalents   0.0359 
_diffrn_reflns_av_sigmaI/netI     0.0522 
_diffrn_reflns_limit_h_min        -14 
_diffrn_reflns_limit_h_max        14 
_diffrn_reflns_limit_k_min        -6 
_diffrn_reflns_limit_k_max        8 
_diffrn_reflns_limit_l_min        -28 
_diffrn_reflns_limit_l_max        26 
_diffrn_reflns_theta_min          1.88 
_diffrn_reflns_theta_max          28.27 
_reflns_number_total              3358 
_reflns_number_observed           2453 
_reflns_observed_criterion        >2sigma(I) 
 
_computing_data_collection        'SMART (Siemens, 1995)' 
_computing_cell_refinement        ? 
_computing_data_reduction         ? 
_computing_structure_solution     'SHELXS-86 (Sheldrick, 1990)' 
_computing_structure_refinement   'SHELXL-96 (Sheldrick, 1996)' 
_computing_molecular_graphics     ? 
_computing_publication_material   ? 
 
_refine_special_details 
; 
 Refinement on F^2^ for ALL reflections except for 0 with very negative F^2^ 
 or flagged by the user for potential systematic errors.  Weighted R-factors 
 wR and all goodnesses of fit S are based on F^2^, conventional R-factors R 
 are based on F, with F set to zero for negative F^2^. The observed criterion 
 of F^2^ > 2sigma(F^2^) is used only for calculating _R_factor_obs etc. and is 
 not relevant to the choice of reflections for refinement.  R-factors based 
 on F^2^ are statistically about twice as large as those based on F, and R- 
 factors based on ALL data will be even larger. 
; 
 
_refine_ls_structure_factor_coef  Fsqd  
_refine_ls_matrix_type            full 
_refine_ls_weighting_scheme 
 'calc w=1/[\s^2^(Fo^2^)+(0.0355P)^2^+0.0000P] where P=(Fo^2^+2Fc^2^)/3' 
_atom_sites_solution_primary      direct 
_atom_sites_solution_secondary    difmap 
_atom_sites_solution_hydrogens    geom 
_refine_ls_hydrogen_treatment     ? 
_refine_ls_extinction_method      SHELXL 
_refine_ls_extinction_coef        0.00051(10) 
_refine_ls_extinction_expression 
 'Fc^*^=kFc[1+0.001xFc^2^\l^3^/sin(2\q)]^-1/4^' 
_refine_ls_number_reflns          3358 
_refine_ls_number_parameters      173 
_refine_ls_number_restraints      0 
_refine_ls_R_factor_all           0.0622 
_refine_ls_R_factor_obs           0.0370 
_refine_ls_wR_factor_all          0.0786 
_refine_ls_wR_factor_obs          0.0718 
_refine_ls_goodness_of_fit_all    0.986 
_refine_ls_goodness_of_fit_obs    1.064 
_refine_ls_restrained_S_all       0.986 
_refine_ls_restrained_S_obs       1.064 
_refine_ls_shift/esd_max          0.001 
_refine_ls_shift/esd_mean         0.000 
 
loop_ 
 _atom_site_label 
 _atom_site_type_symbol 
 _atom_site_fract_x 
 _atom_site_fract_y 
 _atom_site_fract_z 
 _atom_site_U_iso_or_equiv 
 _atom_site_thermal_displace_type 
 _atom_site_occupancy 
 _atom_site_calc_flag 
 _atom_site_refinement_flags 
 _atom_site_disorder_group 
Br1 Br 0.87839(4) 0.14182(8) 0.23599(2) 0.01796(12) Uani 1 d . . 
Br2 Br 0.55072(4) 0.15862(8) 0.14447(2) 0.01968(13) Uani 1 d . . 
Br3 Br 0.80916(4) 0.64991(8) 0.11240(2) 0.01987(13) Uani 1 d . . 
Cu1 Cu 0.58892(5) -0.40845(10) -0.04239(3) 0.01616(15) Uani 1 d . . 
Cu2 Cu 0.71309(6) -0.08625(12) 0.18149(3) 0.0310(2) Uani 1 d . . 
Cu3 Cu 0.72118(6) 0.38212(11) 0.18282(3) 0.0286(2) Uani 1 d . . 
O1 O 0.5211(3) -0.3445(5) 0.03775(15) 0.0188(7) Uani 1 d . . 
H1A H 0.5367(3) -0.2303(5) 0.06541(15) 0.023 Uiso 1 calc R . 
N1 N 0.7126(3) -0.1707(6) -0.0414(2) 0.0155(8) Uani 1 d . . 
N2 N 0.6908(3) -0.5137(7) -0.1124(2) 0.0163(9) Uani 1 d . . 
C1 C 0.7104(5) 0.0053(8) -0.0046(2) 0.0188(11) Uani 1 d . . 
H1 H 0.6437(5) 0.0254(8) 0.0213(2) 0.023 Uiso 1 calc R . 
C2 C 0.8050(5) 0.1606(8) -0.0036(2) 0.0222(11) Uani 1 d . . 
H2 H 0.8027(5) 0.2814(8) 0.0228(2) 0.027 Uiso 1 calc R . 
C3 C 0.9017(4) 0.1289(8) -0.0430(2) 0.0230(12) Uani 1 d . . 
H3 H 0.9657(4) 0.2302(8) -0.0434(2) 0.028 Uiso 1 calc R . 
C4 C 0.9051(4) -0.0496(8) -0.0816(2) 0.0202(11) Uani 1 d . . 
H4 H 0.9707(4) -0.0706(8) -0.1081(2) 0.024 Uiso 1 calc R . 
C5 C 0.8079(4) -0.2000(8) -0.0803(2) 0.0155(10) Uani 1 d . . 
C6 C 0.7970(4) -0.3970(8) -0.1200(2) 0.0164(10) Uani 1 d . . 
C7 C 0.8853(4) -0.4671(9) -0.1610(2) 0.0226(11) Uani 1 d . . 
H7 H 0.9579(4) -0.3884(9) -0.1652(2) 0.027 Uiso 1 calc R . 
C8 C 0.8648(5) -0.6560(9) -0.1959(2) 0.0293(13) Uani 1 d . . 
H8 H 0.9240(5) -0.7065(9) -0.2232(2) 0.035 Uiso 1 calc R . 
C9 C 0.7552(5) -0.7680(9) -0.1895(2) 0.0269(12) Uani 1 d . . 
H9 H 0.7384(5) -0.8921(9) -0.2134(2) 0.032 Uiso 1 calc R . 
C10 C 0.6707(5) -0.6925(8) -0.1469(2) 0.0213(11) Uani 1 d . . 
H10 H 0.5975(5) -0.7691(8) -0.1423(2) 0.026 Uiso 1 calc R . 
 
loop_ 
 _atom_site_aniso_label 
 _atom_site_aniso_U_11 
 _atom_site_aniso_U_22 
 _atom_site_aniso_U_33 
 _atom_site_aniso_U_23 
 _atom_site_aniso_U_13 
 _atom_site_aniso_U_12 
Br1 0.0152(2) 0.0200(3) 0.0187(2) 0.0014(2) 0.0006(2) -0.0012(2) 
Br2 0.0160(2) 0.0203(3) 0.0227(3) 0.0003(2) -0.0041(2) 0.0001(2) 
Br3 0.0185(3) 0.0199(3) 0.0212(3) 0.0008(2) 0.0010(2) -0.0003(2) 
Cu1 0.0109(3) 0.0188(3) 0.0188(3) 0.0011(2) 0.0017(2) -0.0041(2) 
Cu2 0.0267(4) 0.0282(4) 0.0380(4) -0.0043(3) -0.0033(3) 0.0056(3) 
Cu3 0.0257(4) 0.0280(4) 0.0321(4) 0.0016(3) -0.0007(3) -0.0057(3) 
O1 0.017(2) 0.021(2) 0.018(2) -0.0054(15) 0.0026(14) -0.0099(15) 
N1 0.014(2) 0.017(2) 0.016(2) 0.006(2) -0.002(2) 0.000(2) 
N2 0.013(2) 0.018(2) 0.017(2) 0.003(2) -0.004(2) -0.001(2) 
C1 0.021(3) 0.019(3) 0.016(2) 0.001(2) 0.000(2) 0.002(2) 
C2 0.026(3) 0.020(3) 0.020(3) 0.004(2) -0.010(2) -0.002(2) 
C3 0.014(2) 0.027(3) 0.027(3) 0.010(2) -0.009(2) -0.007(2) 
C4 0.010(2) 0.027(3) 0.024(3) 0.010(2) -0.003(2) -0.002(2) 
C5 0.012(2) 0.019(3) 0.015(2) 0.006(2) -0.004(2) 0.002(2) 
C6 0.011(2) 0.021(3) 0.017(3) 0.007(2) 0.001(2) 0.002(2) 
C7 0.018(3) 0.032(3) 0.019(3) 0.005(2) 0.004(2) 0.002(2) 
C8 0.029(3) 0.037(3) 0.022(3) 0.006(2) 0.007(2) 0.014(3) 
C9 0.030(3) 0.022(3) 0.028(3) 0.001(2) -0.008(2) 0.006(2) 
C10 0.019(3) 0.017(3) 0.028(3) 0.002(2) -0.002(2) -0.001(2) 
 
_geom_special_details 
; 
 All esds (except the esd in the dihedral angle between two l.s. planes) 
 are estimated using the full covariance matrix.  The cell esds are taken 
 into account individually in the estimation of esds in distances, angles 
 and torsion angles; correlations between esds in cell parameters are only 
 used when they are defined by crystal symmetry.  An approximate (isotropic) 
 treatment of cell esds is used for estimating esds involving l.s. planes. 
; 
 
loop_ 
 _geom_bond_atom_site_label_1 
 _geom_bond_atom_site_label_2 
 _geom_bond_distance 
 _geom_bond_site_symmetry_2 
 _geom_bond_publ_flag 
Br1 Cu3 2.5200(9) . ? 
Br1 Cu2 2.5523(9) . ? 
Br1 Cu3 2.6038(9) 2_645 ? 
Br1 Cu2 2.6334(10) 2_655 ? 
Br2 Cu3 2.4401(9) . ? 
Br2 Cu2 2.4409(9) . ? 
Br3 Cu3 2.4304(9) . ? 
Br3 Cu2 2.4333(9) 1_565 ? 
Cu1 O1 1.923(3) 3_645 ? 
Cu1 O1 1.930(3) . ? 
Cu1 N1 1.975(4) . ? 
Cu1 N2 1.992(4) . ? 
Cu1 Cu1 2.9024(12) 3_645 ? 
Cu2 Br3 2.4333(9) 1_545 ? 
Cu2 Br1 2.6334(10) 2_645 ? 
Cu2 Cu3 2.8434(12) . ? 
Cu2 Cu3 3.0195(12) 2_645 ? 
Cu3 Br1 2.6038(9) 2_655 ? 
Cu3 Cu2 3.0195(12) 2_655 ? 
O1 Cu1 1.923(3) 3_645 ? 
N1 C1 1.332(6) . ? 
N1 C5 1.355(6) . ? 
N2 C10 1.333(6) . ? 
N2 C6 1.369(6) . ? 
C1 C2 1.398(7) . ? 
C2 C3 1.375(7) . ? 
C3 C4 1.367(7) . ? 
C4 C5 1.399(6) . ? 
C5 C6 1.476(7) . ? 
C6 C7 1.382(7) . ? 
C7 C8 1.389(8) . ? 
C8 C9 1.384(7) . ? 
C9 C10 1.386(7) . ? 
 
loop_ 
 _geom_angle_atom_site_label_1 
 _geom_angle_atom_site_label_2 
 _geom_angle_atom_site_label_3 
 _geom_angle 
 _geom_angle_site_symmetry_1 
 _geom_angle_site_symmetry_3 
 _geom_angle_publ_flag 
Cu3 Br1 Cu2 68.19(3) . . ? 
Cu3 Br1 Cu3 111.80(2) . 2_645 ? 
Cu2 Br1 Cu3 71.68(3) . 2_645 ? 
Cu3 Br1 Cu2 71.70(3) . 2_655 ? 
Cu2 Br1 Cu2 112.46(2) . 2_655 ? 
Cu3 Br1 Cu2 76.07(3) 2_645 2_655 ? 
Cu3 Br2 Cu2 71.26(3) . . ? 
Cu3 Br3 Cu2 83.14(3) . 1_565 ? 
O1 Cu1 O1 82.25(14) 3_645 . ? 
O1 Cu1 N1 174.3(2) 3_645 . ? 
O1 Cu1 N1 96.39(14) . . ? 
O1 Cu1 N2 98.19(15) 3_645 . ? 
O1 Cu1 N2 165.56(14) . . ? 
N1 Cu1 N2 81.8(2) . . ? 
O1 Cu1 Cu1 41.21(10) 3_645 3_645 ? 
O1 Cu1 Cu1 41.03(9) . 3_645 ? 
N1 Cu1 Cu1 137.16(12) . 3_645 ? 
N2 Cu1 Cu1 137.58(12) . 3_645 ? 
Br3 Cu2 Br2 120.97(3) 1_545 . ? 
Br3 Cu2 Br1 109.49(3) 1_545 . ? 
Br2 Cu2 Br1 109.18(3) . . ? 
Br3 Cu2 Br1 99.89(3) 1_545 2_645 ? 
Br2 Cu2 Br1 108.97(3) . 2_645 ? 
Br1 Cu2 Br1 107.31(3) . 2_645 ? 
Br3 Cu2 Cu3 130.56(3) 1_545 . ? 
Br2 Cu2 Cu3 54.36(2) . . ? 
Br1 Cu2 Cu3 55.37(2) . . ? 
Br1 Cu2 Cu3 129.14(3) 2_645 . ? 
Br3 Cu2 Cu3 117.06(3) 1_545 2_645 ? 
Br2 Cu2 Cu3 121.47(3) . 2_645 ? 
Br1 Cu2 Cu3 54.95(2) . 2_645 ? 
Br1 Cu2 Cu3 52.41(2) 2_645 2_645 ? 
Cu3 Cu2 Cu3 92.67(3) . 2_645 ? 
Br3 Cu3 Br2 117.57(3) . . ? 
Br3 Cu3 Br1 113.68(3) . . ? 
Br2 Cu3 Br1 110.27(3) . . ? 
Br3 Cu3 Br1 100.80(3) . 2_655 ? 
Br2 Cu3 Br1 104.13(3) . 2_655 ? 
Br1 Cu3 Br1 109.21(3) . 2_655 ? 
Br3 Cu3 Cu2 132.39(3) . . ? 
Br2 Cu3 Cu2 54.38(2) . . ? 
Br1 Cu3 Cu2 56.45(2) . . ? 
Br1 Cu3 Cu2 126.77(3) 2_655 . ? 
Br3 Cu3 Cu2 118.33(3) . 2_655 ? 
Br2 Cu3 Cu2 122.59(3) . 2_655 ? 
Br1 Cu3 Cu2 55.90(2) . 2_655 ? 
Br1 Cu3 Cu2 53.37(2) 2_655 2_655 ? 
Cu2 Cu3 Cu2 94.61(3) . 2_655 ? 
Cu1 O1 Cu1 97.75(14) 3_645 . ? 
C1 N1 C5 119.6(4) . . ? 
C1 N1 Cu1 125.1(3) . . ? 
C5 N1 Cu1 115.2(3) . . ? 
C10 N2 C6 119.2(4) . . ? 
C10 N2 Cu1 126.6(3) . . ? 
C6 N2 Cu1 113.8(3) . . ? 
N1 C1 C2 122.1(5) . . ? 
C3 C2 C1 117.8(5) . . ? 
C4 C3 C2 120.9(5) . . ? 
C3 C4 C5 118.7(5) . . ? 
N1 C5 C4 120.8(4) . . ? 
N1 C5 C6 114.2(4) . . ? 
C4 C5 C6 125.0(4) . . ? 
N2 C6 C7 120.9(5) . . ? 
N2 C6 C5 114.4(4) . . ? 
C7 C6 C5 124.7(4) . . ? 
C6 C7 C8 119.5(5) . . ? 
C9 C8 C7 119.0(5) . . ? 
C8 C9 C10 119.0(5) . . ? 
N2 C10 C9 122.3(5) . . ? 
 
_refine_diff_density_max    1.091 
_refine_diff_density_min   -0.958 
_refine_diff_density_rms    0.172 
